# Supplementary material for: A study on the conformation-dependent colorimetric response of polydiacetylene supramolecules to external triggers
Source: Royal Society of Chemistry journal article supplement (doi:10.1039/d2qm01006b), 2022-12-13
Supplement: d2qm01006b1.pdf [file d2qm01006b1.pdf]

# ELECTRONIC SUPPLEMENTARY INFORMATION

## A study on the conformation-dependent colorimetric response of Polydiacetylene supramolecules to external triggers

*Hande E. Cingil<sup>a\*</sup>, Gizem Beliktay<sup>b</sup>, Eric M. M. Tan<sup>a,b</sup>*

<sup>a</sup> Sabanci University Nanotechnology Research and Application Center, Tuzla, Istanbul 34956,  
Turkey

<sup>b</sup> Faculty of Engineering and Natural Science, Sabanci University, 34956 Istanbul, Turkey

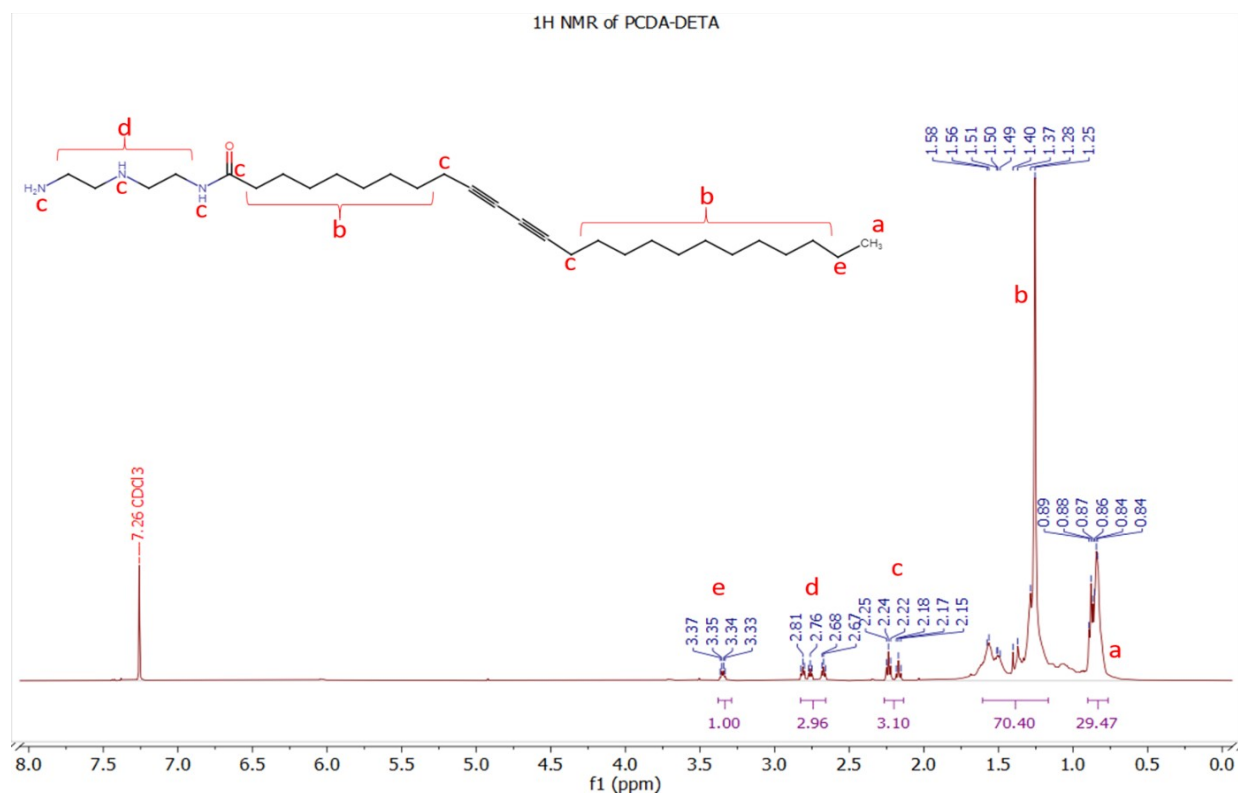

**Fig. S1** <sup>1</sup>H NMR spectrum of PCDA-DETA

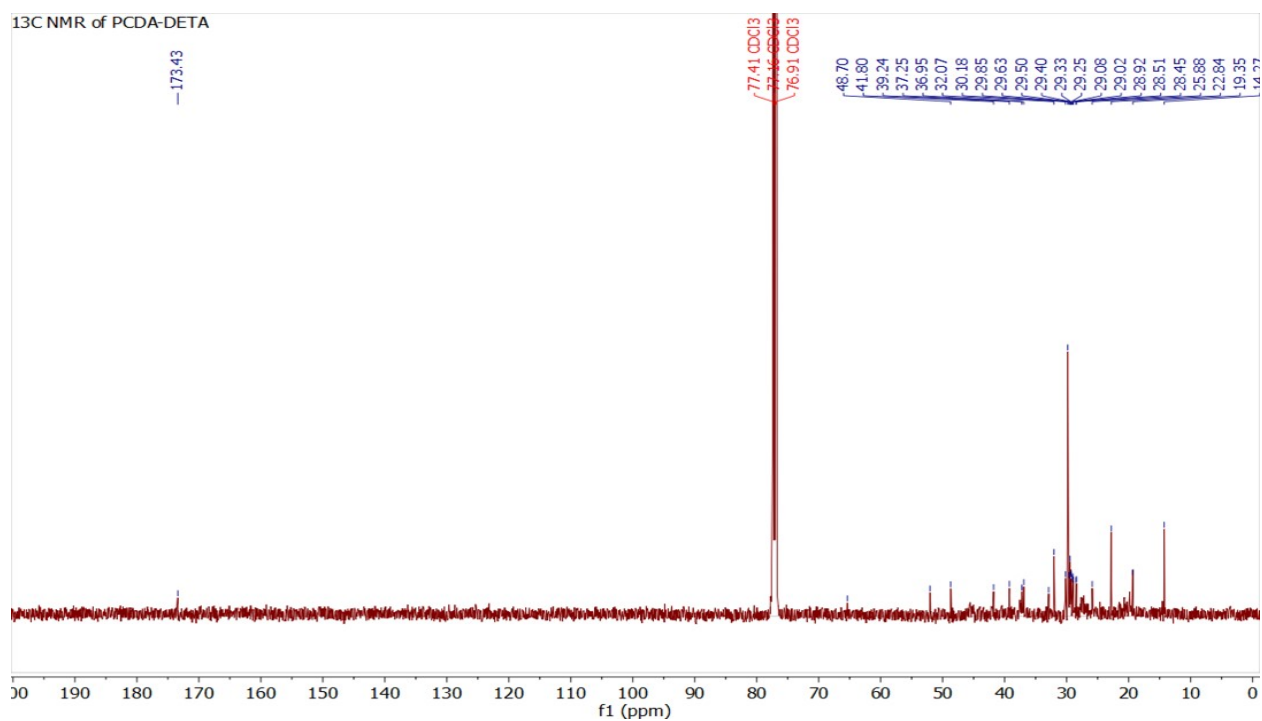

**Fig. S2** <sup>13</sup>C NMR spectrum of PCDA-DETA

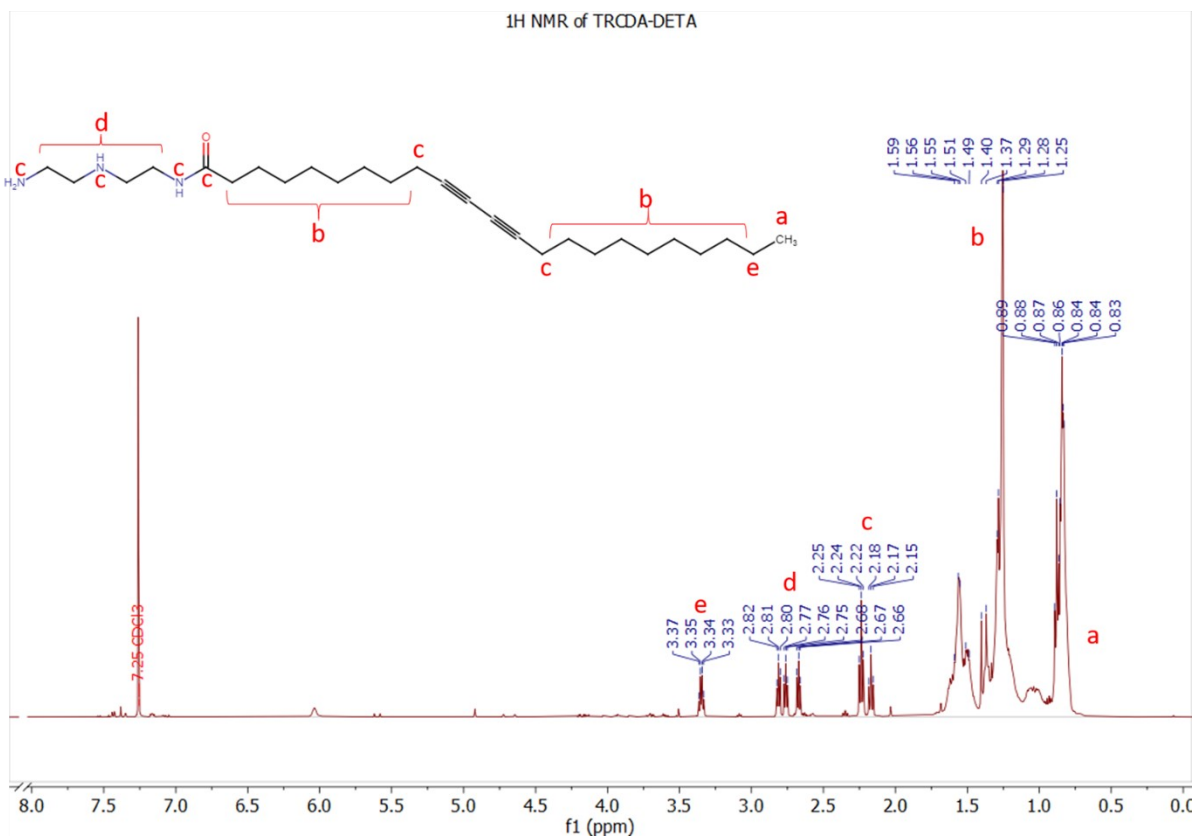

Fig. S3  $^1\text{H}$  NMR spectrum of TCDA-DETA

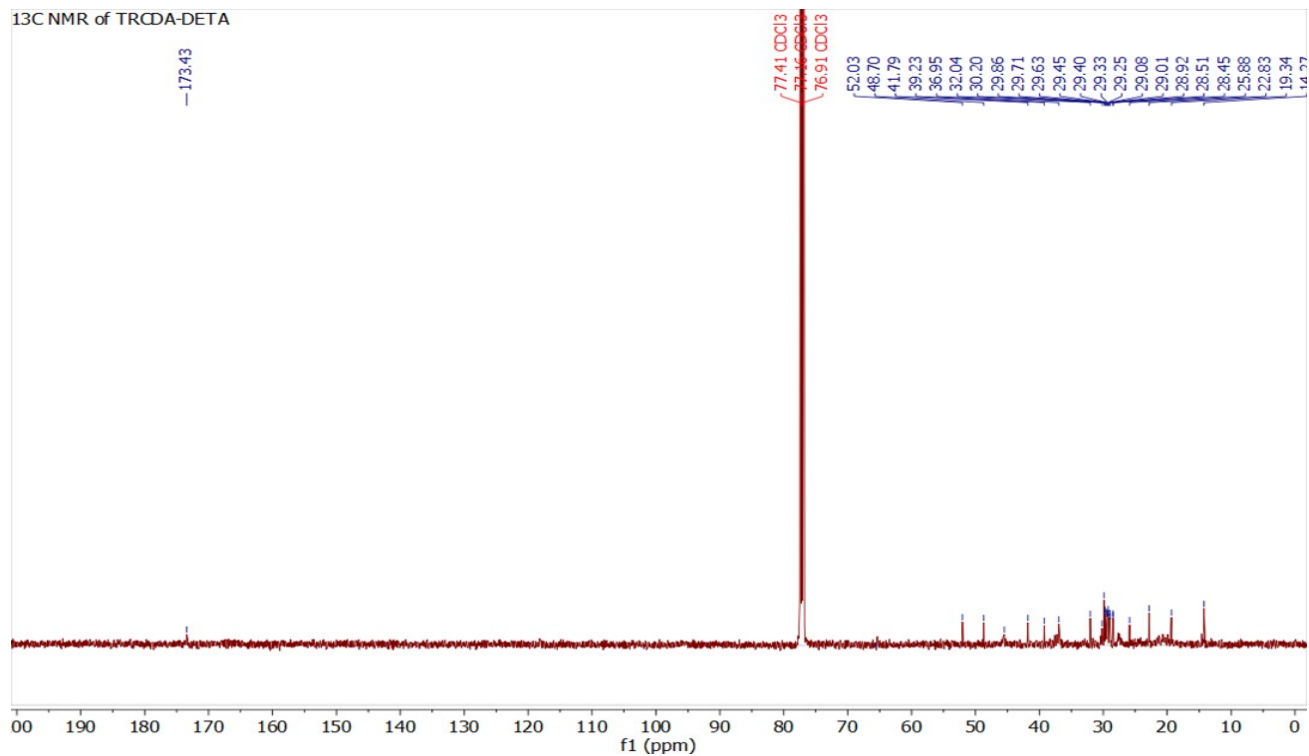

Fig. S4  $^{13}\text{C}$  NMR spectrum of TCDA-DETA

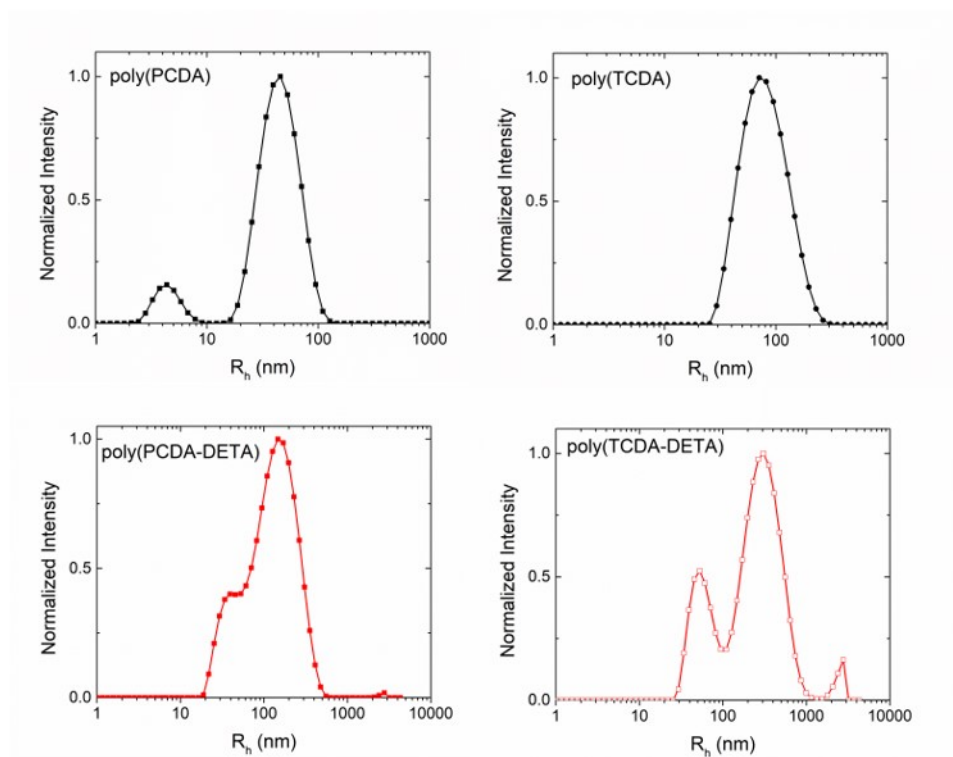

**Fig. S5** Normalized intensity-weighted size distributions, displaying the hydrodynamic radii ( $R_h$ ) of PDA vesicles formed by various monomers.

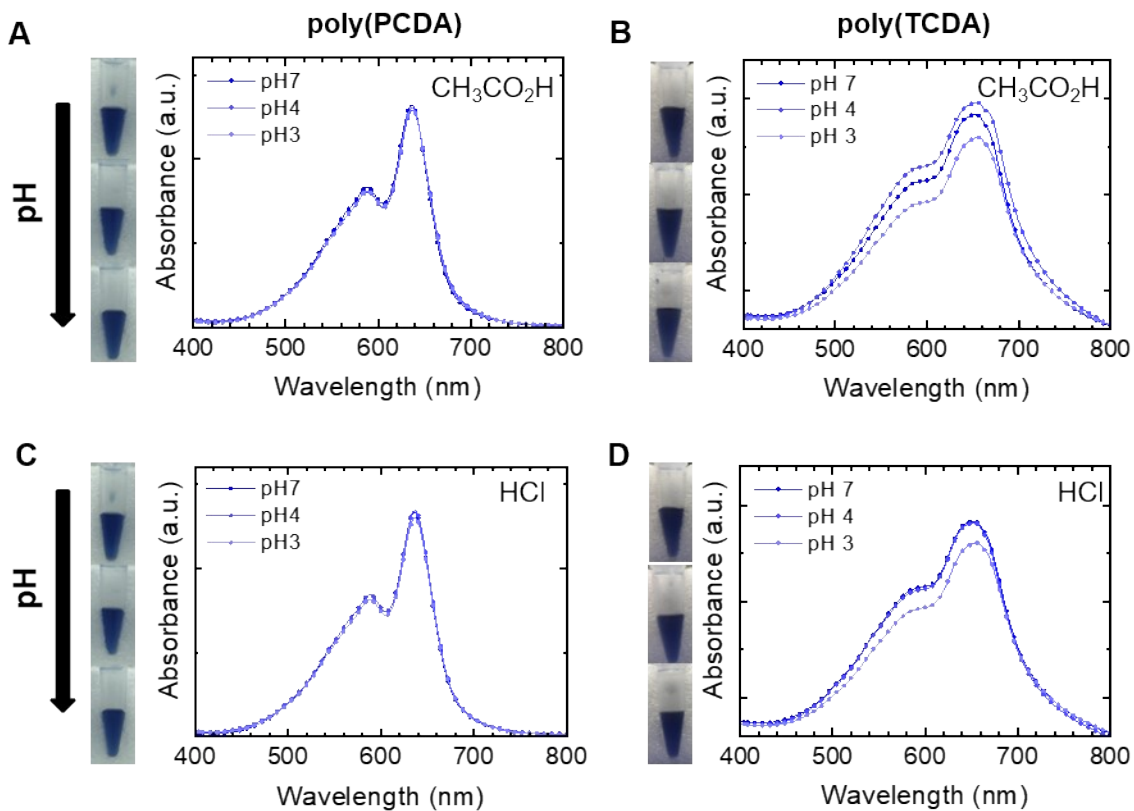

**Fig. S6** UV-Vis absorption spectra and photos obtained at pH 7, 4, and 3 upon acetic acid addition to poly(PCDA) (A) and to poly(TCDA) (B); upon hydrochloric acid addition to poly(PCDA) (C) and to poly(TCDA) (D).

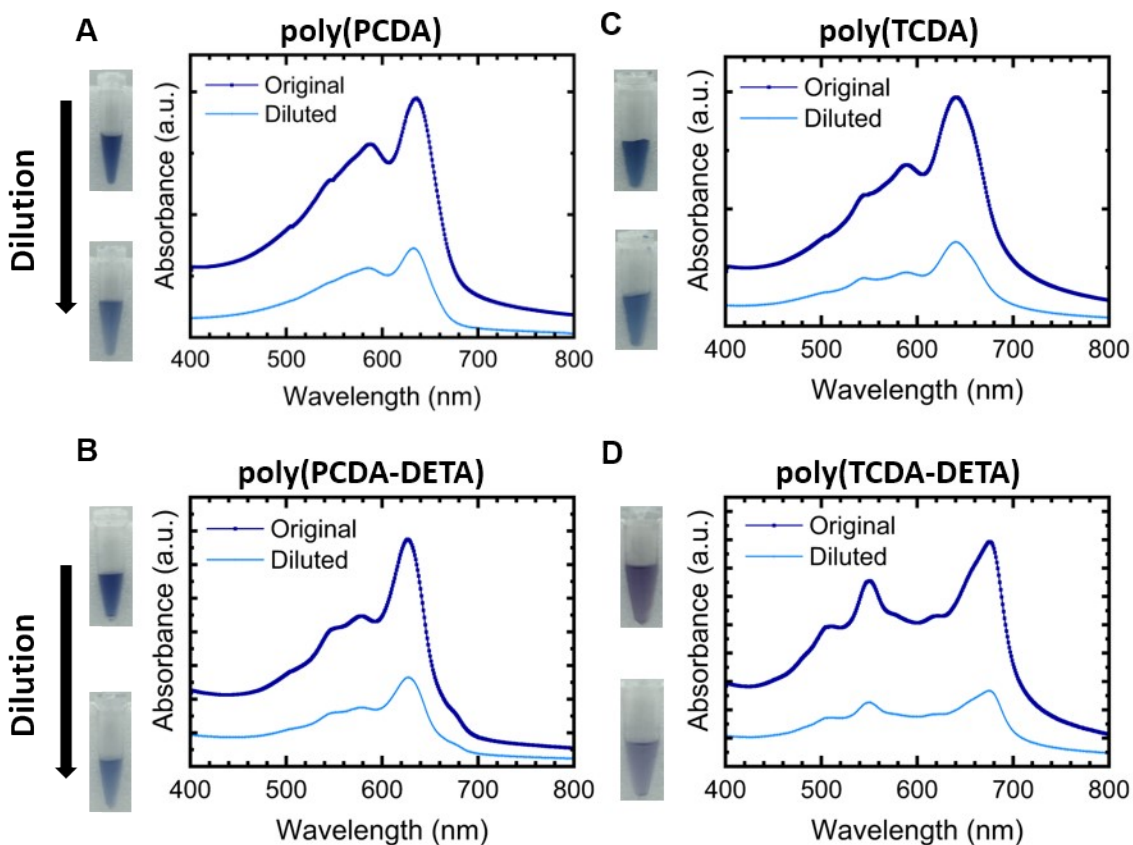

**Fig. S7** UV-Vis absorption spectra and photos recorded after diluting the polymer vesicle solutions poly(PCDA) (A); poly(PCDA-DETA) (B); poly(TCDA) (C); poly(TCDA-DETA) to a final volume that increased by threefold by adding only Milli-Q.

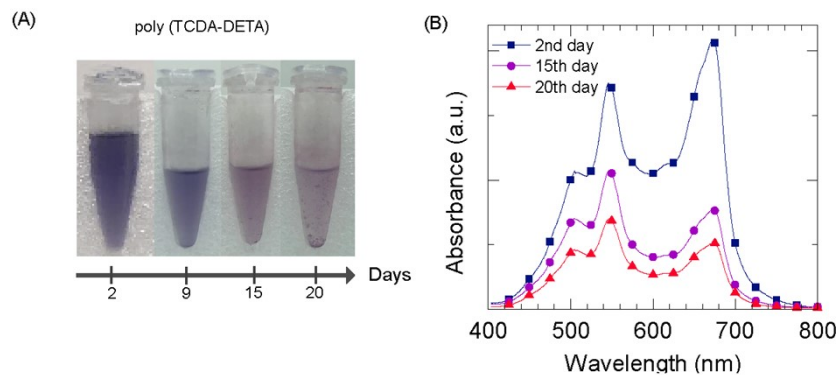

**Fig. S8** Photos of poly(TCDA-DETA) vesicle solution captured on different days up to 3 weeks (A); UV-Vis absorption spectra of poly(TCDA-DETA) vesicle solutions recorded on corresponding days (B).

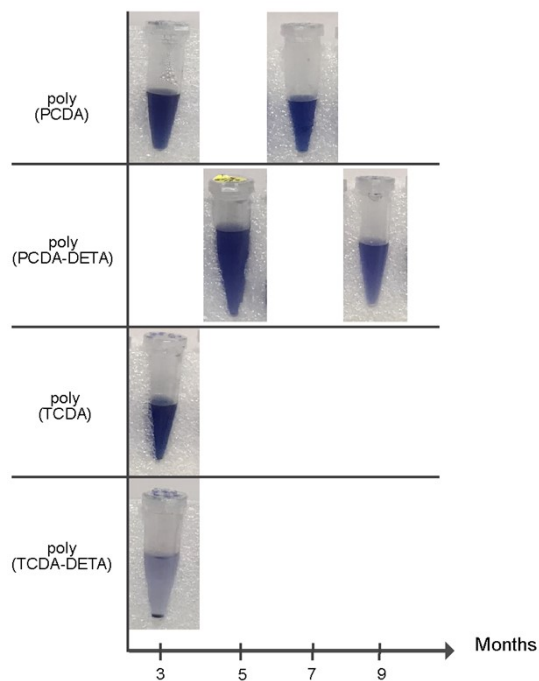

**Fig. S9** Photos of polymer vesicle solutions captured months after preparation.
